# Supplementary material for: Polyphenols and IUGR Pregnancies: Effects of the Antioxidant Hydroxytyrosol on the Hippocampus Proteome in a Porcine Model
Source: MDPI journal article supplement (doi:10.3390/antiox11061135), 2022-06-09
Supplement: s1 [file s1]

**Supplementary Table S1:** Statistical results of the GO overrepresentation test of the comparison between the Ctrl and HTX groups

**GO molecular function complete**

| GO molecular function complete     | #    | # | expected | fold enrichment | +/- | raw <i>p</i> -value   | FDR                   |
|------------------------------------|------|---|----------|-----------------|-----|-----------------------|-----------------------|
| enoyl-CoA hydratase activity       | 10   | 2 | .01      | > 100           | +   | $1.71 \times 10^{-5}$ | $2.79 \times 10^{-2}$ |
| structural constituent of ribosome | 168  | 4 | .09      | 44.56           | +   | $1.48 \times 10^{-6}$ | $7.26 \times 10^{-3}$ |
| RNA binding                        | 1655 | 7 | .88      | 7.92            | +   | $5.42 \times 10^{-6}$ | $1.33 \times 10^{-2}$ |

**GO biological process complete**

| GO biological process complete | #   | # | expected | fold enrichment | +/- | raw <i>p</i> -value   | FDR                   |
|--------------------------------|-----|---|----------|-----------------|-----|-----------------------|-----------------------|
| cytoplasmic translation        | 124 | 4 | .07      | 60.38           | +   | $4.54 \times 10^{-7}$ | $7.11 \times 10^{-3}$ |
| translation                    | 377 | 5 | .20      | 24.82           | +   | $9.00 \times 10^{-7}$ | $7.06 \times 10^{-3}$ |
| peptide biosynthetic process   | 404 | 5 | .22      | 23.16           | +   | $1.26 \times 10^{-6}$ | $6.59 \times 10^{-3}$ |
| peptide metabolic process      | 538 | 5 | .29      | 17.40           | +   | $5.06 \times 10^{-6}$ | $1.59 \times 10^{-2}$ |
| amide biosynthetic process     | 520 | 5 | .28      | 18.00           | +   | $4.29 \times 10^{-6}$ | $1.68 \times 10^{-2}$ |

**GO cellular component complete**

| GO cellular component complete    | #   | # | expected | fold enrichment | +/- | raw <i>p</i> -value   | FDR                   |
|-----------------------------------|-----|---|----------|-----------------|-----|-----------------------|-----------------------|
| polysomal ribosome                | 32  | 2 | .02      | > 100           | +   | $1.44 \times 10^{-4}$ | $4.20 \times 10^{-2}$ |
| ribosome                          | 226 | 4 | .12      | 33.13           | +   | $4.70 \times 10^{-6}$ | $2.40 \times 10^{-3}$ |
| ribonucleoprotein complex         | 687 | 5 | .37      | 13.62           | +   | $1.65 \times 10^{-5}$ | $6.72 \times 10^{-3}$ |
| cytosolic large ribosomal subunit | 58  | 3 | .03      | 96.81           | +   | $4.01 \times 10^{-6}$ | $2.73 \times 10^{-3}$ |
| cytosolic ribosome                | 104 | 4 | .06      | 71.99           | +   | $2.29 \times 10^{-7}$ | $4.68 \times 10^{-4}$ |
| large ribosomal subunit           | 113 | 3 | .06      | 49.69           | +   | $2.78 \times 10^{-5}$ | $9.45 \times 10^{-3}$ |
| ribosomal subunit                 | 187 | 4 | .10      | 40.04           | +   | $2.25 \times 10^{-6}$ | $2.29 \times 10^{-3}$ |
